# Supplementary material for: A new R package to parse plant species occurrence records into unique collection events efficiently reduces data redundancy
Source: PubMed Central journal article supplement (PMC10914741; doi:10.1038/s41598-024-56158-3), 2024-03-05
Supplement: 41598_2024_56158_MOESM1_ESM.pdf [file 41598_2024_56158_MOESM1_ESM.pdf]

## Supplementary Information

### A new R package to parse plant species occurrence records into unique collection events efficiently reduces data redundancy

Pablo Hendrigo Alves de Melo, Nadia Bystriakova, Eve Lucas, Alexandre Monro

Table S1. Interpretation of GBIF geospatial issues (<https://data-blog.gbif.org/post/issues-and-flags/>).

| <b>GBIF geospatial issue</b>                   | <b>Description</b>                                                                          | <b>Priority</b> | <b>Selection score</b> | <b>Reasoning</b>                    |
|------------------------------------------------|---------------------------------------------------------------------------------------------|-----------------|------------------------|-------------------------------------|
| <b>1</b> COORDINATE_UNCERTAINTY_METERS_INVALID | Indicates an invalid or very unlikely <code>dwc:uncertaintyInMeters</code> .                | Low             | -1                     | Does not affect coordinate accuracy |
| <b>2</b> CONTINENT_COORDINATE_MISMATCH         | The interpreted occurrence coordinates fall outside of the indicated continent.             | Low             | -1                     | Does not affect coordinate accuracy |
| <b>3</b> CONTINENT_COUNTRY_MISMATCH            | The interpreted continent and country do not match.                                         | Low             | -1                     | Does not affect coordinate accuracy |
| <b>4</b> CONTINENT_DERIVED_FROM_COORDINATES    | The interpreted continent is based on the coordinates, not the verbatim string information. | Low             | -1                     | Does not affect coordinate accuracy |
| <b>5</b> CONTINENT_DERIVED_FROM_COUNTRY        | The interpreted continent is based on the country, not the verbatim string information.     | Low             | -1                     | Does not affect coordinate accuracy |

| <b>GBIF geospatial issue</b>                       | <b>Description</b>                                                                                    | <b>Priority</b> | <b>Selection score</b> | <b>Reasoning</b>                    |
|----------------------------------------------------|-------------------------------------------------------------------------------------------------------|-----------------|------------------------|-------------------------------------|
| <b>6</b> COORDINATE_ACCURACY_INVALID               | Deprecated.B                                                                                          | Low             | -1                     | Does not affect coordinate accuracy |
| <b>7</b> COORDINATE_PRECISION_INVALID              | Indicates an invalid or very unlikely coordinatePrecision                                             | Low             | -1                     | Does not affect coordinate accuracy |
| <b>8</b> COORDINATE_PRECISION_UNCERTAINTY_MISMATCH | Deprecated.B                                                                                          | Low             | -1                     | Does not affect coordinate accuracy |
| <b>9</b> COORDINATE_REPROJECTED                    | The original coordinate was successfully reprojected from a different geodetic datum to WGS84.        | Low             | -1                     | Does not affect coordinate accuracy |
| <b>10</b> ELEVATION_NON_NUMERIC                    | Set if elevation is a non-numeric value                                                               | Low             | -1                     | Does not affect coordinate accuracy |
| <b>11</b> ELEVATION_NOT_METRIC                     | Set if supplied elevation is not given in the metric system, for example using feet instead of meters | Low             | -1                     | Does not affect coordinate accuracy |
| <b>12</b> ELEVATION_UNLIKELY                       | Set if elevation is above the troposphere (17km) or below 11km (Mariana Trench).                      | Low             | -1                     | Does not affect coordinate accuracy |
| <b>13</b> CONTINENT_INVALID                        | Uninterpretable continent values found.                                                               | Low             | -1                     | Does not affect coordinate accuracy |
| <b>14</b> COUNTRY_DERIVED_FROM_COORDINATES         | The interpreted country is based on the coordinates, not the verbatim string information.             | Low             | -1                     | Does not affect coordinate accuracy |

| <b>GBIF geospatial issue</b>             | <b>Description</b>                                                                                      | <b>Priority</b> | <b>Selection score</b> | <b>Reasoning</b>                                                           |
|------------------------------------------|---------------------------------------------------------------------------------------------------------|-----------------|------------------------|----------------------------------------------------------------------------|
| <b>15</b> COUNTRY_INVALID                | Uninterpretable country values found.                                                                   | Low             | -1                     | Does not affect coordinate accuracy                                        |
| <b>16</b> ELEVATION_MIN_MAX_SWAPPED      | Set if supplied minimum elevation > maximum elevation                                                   | Low             | -1                     | Does not affect coordinate accuracy                                        |
| <b>17</b> COORDINATE_ROUNDED             | Original coordinate modified by rounding to 5 decimals.                                                 | Low             | -1                     | Does not affect coordinate accuracy at 1x1 km or coarser resolution        |
| <b>18</b> DEPTH_MIN_MAX_SWAPPED          | Set if supplied minimum depth > maximum depth                                                           | None            | 0                      | Not applicable                                                             |
| <b>19</b> DEPTH_NON_NUMERIC              | Set if depth is a non-numeric value                                                                     | None            | 0                      | Not applicable                                                             |
| <b>20</b> DEPTH_NOT_METRIC               | Set if supplied depth is not given in the metric system, for example using feet instead of meters       | None            | 0                      | Not applicable                                                             |
| <b>21</b> DEPTH_UNLIKELY                 | Set if depth is larger than 11,000m or negative.                                                        | None            | 0                      | Not applicable                                                             |
| <b>22</b> COUNTRY_MISMATCH               | Interpreted country for dwc:country and dwc:countryCode contradict each other.                          | Low             | -1                     | Possibly due to geopolitical changes. Does not affect coordinate accuracy. |
| <b>23</b> COORDINATE_REPROJECTION_FAILED | The given decimal latitude and longitude could not be reprojected to WGS84 based on the provided datum. | Medium          | -3                     | Potentially affect coordinate accuracy                                     |

| <b>GBIF geospatial issue</b>                 | <b>Description</b>                                                                                                                            | <b>Priority</b> | <b>Selection score</b> | <b>Reasoning</b>                                              |
|----------------------------------------------|-----------------------------------------------------------------------------------------------------------------------------------------------|-----------------|------------------------|---------------------------------------------------------------|
| <b>24</b> COORDINATE_REPROJECTION_SUSPICIOUS | Indicates successful coordinate reprojection according to provided datum, but which results in a datum shift larger than 0.1 decimal degrees. | Medium          | -3                     | Potentially affect coordinate accuracy                        |
| <b>25</b> GEODETIC_DATUM_INVALID             | The geodetic datum given could not be interpreted.                                                                                            | Medium          | -3                     | Potentially affect coordinate accuracy                        |
| <b>26</b> PRESUMED_NEGATED_LATITUDE          | Latitude appears to be negated, e.g.                                                                                                          | Medium          | -3                     | Potentially affect coordinate accuracy                        |
| <b>27</b> PRESUMED_NEGATED_LONGITUDE         | Longitude appears to be negated, e.g.                                                                                                         | Medium          | -3                     | Potentially affect coordinate accuracy                        |
| <b>28</b> PRESUMED_SWAPPED_COORDINATE        | Latitude and longitude appear to be swapped.                                                                                                  | Medium          | -3                     | Potentially affect coordinate accuracy                        |
| <b>29</b> GEODETIC_DATUM_ASSUMED_WGS84       | Indicating that the interpreted coordinates assume they are based on WGS84 datum as the datum was either not indicated or interpretable.      | Medium          | -3                     | Potentially affect coordinate accuracy, if datum is not WGS84 |
| <b>30</b> COORDINATE_INVALID                 | Coordinate value is given in some form but GBIF is unable to interpret it.                                                                    | High            | -9                     | Records to be excluded from spatial analysis                  |
| <b>31</b> COORDINATE_OUT_OF_RANGE            | Coordinate has a latitude and/or longitude value beyond the maximum (or minimum) decimal value.                                               | High            | -9                     | Records to be excluded from spatial analysis                  |

| GBIF geospatial issue          | Description                                                                          | Priority | Selection score | Reasoning                                    |
|--------------------------------|--------------------------------------------------------------------------------------|----------|-----------------|----------------------------------------------|
| 32 COUNTRY_COORDINATE_MISMATCH | The interpreted occurrence coordinates fall outside of the indicated country.        | High     | -9              | Records to be excluded from spatial analysis |
| 33 ZERO_COORDINATE             | Coordinate is the exact 0B°, 0B° coordinate, often indicating a bad null coordinate. | High     | -9              | Records to be excluded from spatial analysis |

Table S2. Summary of merged fields. DWC definition is provided according to Darwin Core List of Terms (<http://rs.tdwg.org/dwc/doc/list/2023-09-18>).

| Merged field       | Number of records | DWC definition                                                                                                                                                                        |
|--------------------|-------------------|---------------------------------------------------------------------------------------------------------------------------------------------------------------------------------------|
| Ctrl_habitat       | 16903             | A category of description of the habitat in which the dwc:Event occurred.                                                                                                             |
| Ctrl_fieldNotes    | 9079              | Either, a) an indicator of the existence of, b) a reference to (publication, URI), or c) the text of notes taken in the field about the dwc:Event.                                    |
| Ctrl_municipality  | 8583              | The full, unabbreviated name of the next smaller administrative region than county (city, municipality, etc.) in which the dcterms:Location occurs.                                   |
| Ctrl_stateProvince | 3884              | The name of the subsequent administrative region below country in which dcterms:Location occurs.                                                                                      |
| Ctrl_year          | 3639              | The four-digit year in which the dwc:Event occurred, according to the Common Era Calendar.                                                                                            |
| Ctrl_eventDate     | 3639              | The date-time or interval during which a dwc:Event occurred. For occurrences, this is the date-time when the dwc:Event was recorded. Not suitable for a time in a geological context. |

| Merged field    | Number of records | DWC definition                                                                                                                                                                                                                                                                                                                                          |
|-----------------|-------------------|---------------------------------------------------------------------------------------------------------------------------------------------------------------------------------------------------------------------------------------------------------------------------------------------------------------------------------------------------------|
| Ctrl_locality   | 2344              | Less specific geographic information can be provided in other geographic terms (dwc:higherGeography, dwc:continent, dwc:country, dwc:stateProvince, dwc:county, dwc:municipality, dwc:waterBody, dwc:island, dwc:islandGroup). This term may contain information modified from the original to correct perceived errors or standardize the description. |
| Ctrl_level0Name | 1249              | Additional properties from database of Global Administrative Areas level 0 subdivision or Country. Is the familiar concept of first-level political entity                                                                                                                                                                                              |
| Ctrl_level1Name | 1250              | Additional properties from database of Global Administrative Areas level 1 subdivision or State/Province. Is a primary subdivision of a country, be it state, province, department.                                                                                                                                                                     |
| Ctrl_level2Name | 1242              | Additional properties from database of Global Administrative Areas level 2 subdivision or County. Is a                                                                                                                                                                                                                                                  |

| Merged field     | Number of records | DWC definition                                                                                                                                                           |
|------------------|-------------------|--------------------------------------------------------------------------------------------------------------------------------------------------------------------------|
|                  |                   | second-level political subdivision of a country, regardless of local labels.                                                                                             |
| Ctrl_level3Name  | 302               | Additional properties from database of Global Administrative Areas level 3 subdivision. Is a third-level political subdivision of a country, regardless of local labels. |
| Ctrl_countryCode | 184               | The standard code for the country in which the dcterms:Location occurs.                                                                                                  |



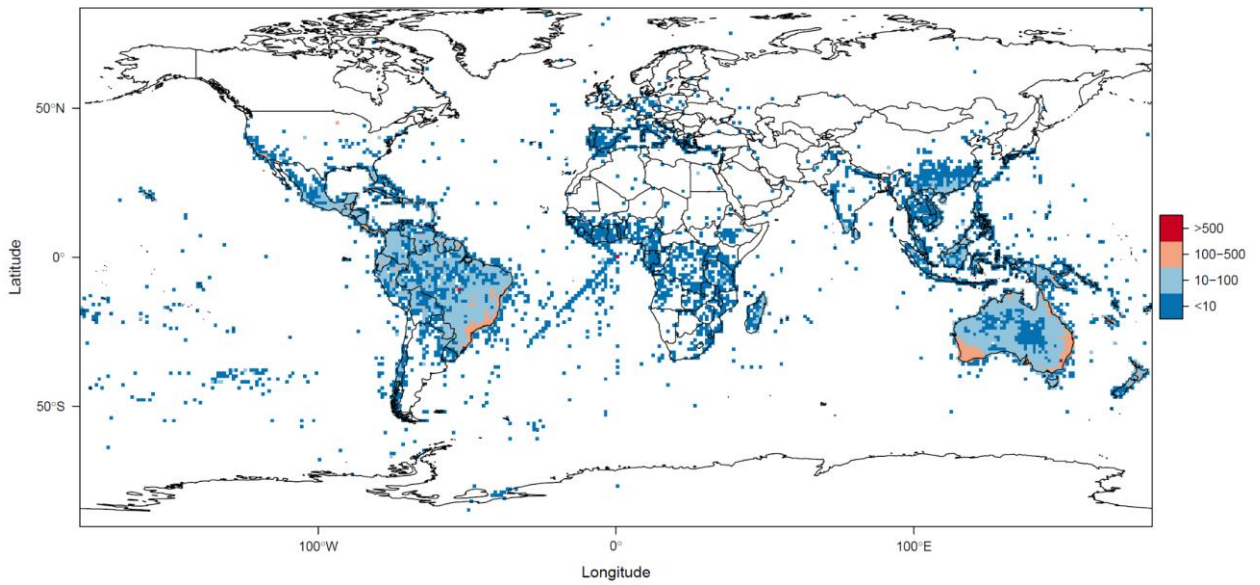

**Figure S1.** Myrtaceae taxon richness in 1 x 1 degree grid squares, GBIF data. A geometric pattern produced by records with zero-zero and longitude-equal-latitude coordinates is visible near the western coast of the African continent. Map created with custom R script. Base map source: ESRI (<http://www.esri.com/data/basemaps>, © Esri, DeLorme Publishing Company).

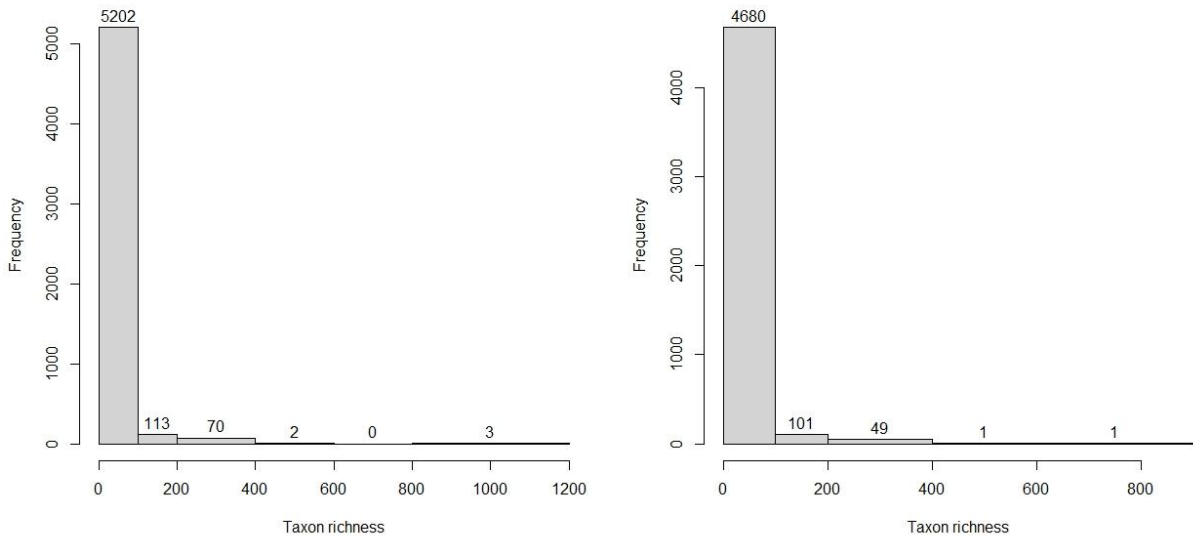

**Figure S2.** Myrtaceae taxon richness in 1 x 1 degree grid squares, GBIF (left) and ParseGBIF (right) data.

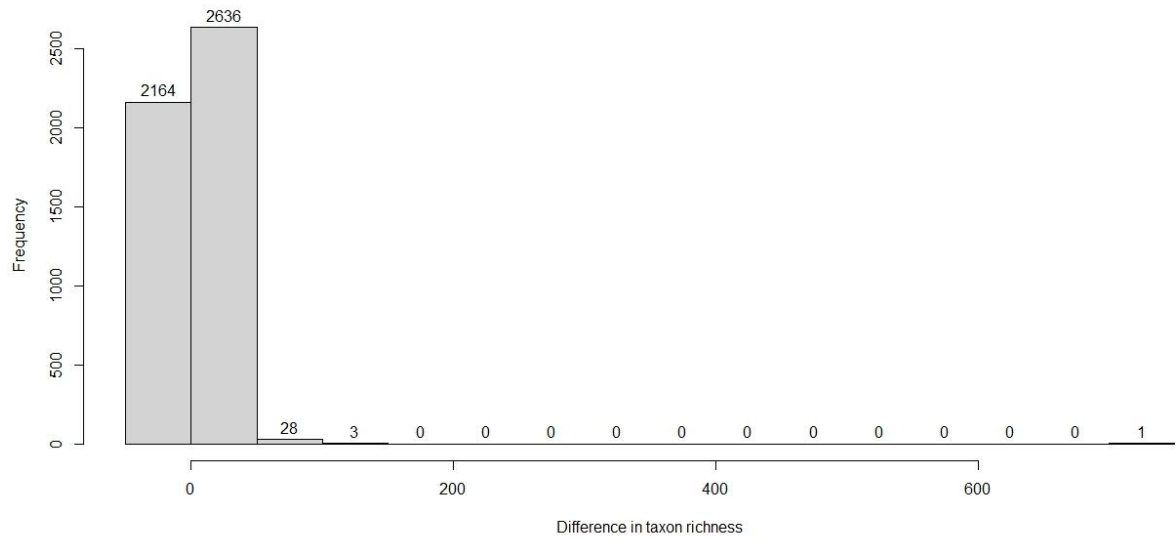

**Figure S3.** Difference between GBIF and ParseGBIF in taxon richness in 1 x 1 degree grid squares. The majority of values are below 20, with a single grid square (far right) having 736 taxa.
